# Supplementary material for: The prognostic value of a Methylome-based Malignancy Density Scoring System to predict recurrence risk in early-stage Lung Adenocarcinoma
Source: PubMed Central journal article supplement (PMC7359091; doi:10.7150/thno.44229), 2020-06-18
Supplement: thnov10p7635s1.pdf [file thnov10p7635s1.pdf]

**Table S1.** The methylation block (MB)-based methylation level and clinical characteristics of patients (See separate Excel file).

**Table S2.** List of 520-cancer related genes

| Gene    |          |         |        |           |        |         |         |
|---------|----------|---------|--------|-----------|--------|---------|---------|
| ABL1    | MAGI2    | RPTOR   | MED12  | GSTT1     | CDKN1B | XRCC3   | XPO1    |
| ABL2    | RET      | MAP3K1  |        | H3F3A     | CDKN1C | EIF1AX  | XRCC2   |
| AKT1    | ERCC2    | RUNX1   | MEF2B  | H3F3C     | CDKN2A | CYP17A1 | STAT5A  |
| AKT2    | HLA-A    | SDHA    | MEN1   | HGF       | CDKN2B | E2F3    | GPR124  |
| AKT3    | PGR      | SDHB    | MET    | HIST1H1C  | CDKN2C | EGFL7   | RECQL4  |
| ALK     | ACVR1B   | SDHC    | MITF   | HIST1H2BD | CEBPA  | ICOSLG  | DNMT1   |
| ALOX12B | RICTOR   | MCL1    |        | HIST1H3A  | CHD1   | MAPK1   | ELOC    |
| AMER1   | CASP8    | SDHD    | MLH1   | HIST1H3B  | CHEK1  | RHEB    | B2M     |
| APC     | HDAC2    | SETD2   | MLH3   | HIST1H3C  | CHEK2  | CALR    | RHOA    |
| AR      | FGF23    | SF3B1   | MPL    | HIST1H3D  | CIC    | CD276   | IGF1    |
| ARAF    | FGF6     | SLX4    | MRE11A | HIST1H3E  | CREBBP | EPCAM   | IRF2    |
| ARID1A  | FGF7     | SMAD2   | MSH2   | HIST1H3G  | CRKL   | FAS     | ACVR1   |
| ARID1B  | H3F3B    | SMAD3   | MSH3   | HIST1H3H  | CRLF2  | TGFBR1  | EIF4E   |
| ARID2   | HIST1H3F | SMAD4   | MSH6   | INPP4A    | RAD50  | FGF4    | RANBP2  |
| ASXL1   | HSD3B1   | SMARCA4 | MTOR   | INSR      | PTPRD  | FGF19   | STAT4   |
| ATM     | MYOD1    | SMARCB1 | MUTYH  | MAP3K13   | RAD52  | FH      | FCGR2B  |
| ATR     | PHOX2B   | SMO     | MYC    | MST1R     | RAF1   | LRP1B   | HDAC4   |
| ATRX    | SOX10    | SOCS1   | MYCL   | NCOR1     | PTPN11 | FBXW7   | PARP1   |
| AURKA   | TMEM127  | PARP2   | MYCN   | NEB       | KDM6A  | FANCC   | MALT1   |
| AURKB   | BACH1    | PIK3CD  | MYD88  | NOTCH2    | CSF1R  | YAP1    | AXIN2   |
| AXIN1   | BBC3     | NOTCH4  | NBN    | NOTCH3    | CTCF   | ZFXH3   | SMARCD1 |
| AXL     | CENPA    | LATS2   | NF1    | NPM1      | CTNNB1 | GPS2    | CUL4A   |
| BAP1    | CTLA4    | PARP3   | NF2    | NRAS      | CUL3   | PIK3R3  | TRAF7   |
| BARD1   | GNA13    | ASXL2   | NFE2L2 | NSD1      | DAXX   | ANKRD11 | CHUK    |
| BCL2    | SDHAF2   | MDC1    | NFKBIA | NTHL1     | DDR2   | CRBN    | SLIT2   |
| BCL2L1  | RYBP     | MST1    | NKX2-1 | NTRK1     | DICER1 | EIF4A2  | BCL2L2  |
| BCL6    | SH2D1A   | FGF12   | NOTCH1 | NTRK2     | DNMT3A | ERCC4   | BTG1    |
| BCOR    | APCDD1   | QKI     | SOX2   | NTRK3     | DOT1L  | REL     | CXCR4   |

|         |          |          |          |           |          |         |          |
|---------|----------|----------|----------|-----------|----------|---------|----------|
| BLM     | IL10     | BMPR1A   | SOX9     | NUP93     | HIST1H3I | SHQ1    | FOXA1    |
| BRAF    | KLF4     | BCORL1   | SPEN     | PAK3      | RAD54L   | LMO1    | HDAC1    |
| BRCA1   | PDCD1    | PAK1     | SPOP     | PALB2     | HIST1H3J | TET1    | HIST2H3C |
| BRCA2   | TIPARP   | RPS6KB2  | SPTA1    | PARK2     | HIST2H3D | YES1    | HOXB13   |
| BRD4    | VTCN1    | RPS6KA4  | SRC      | PAX5      | HIST3H3  | ZRSR2   | ID3      |
| BRIP1   | WISP3    | FGF14    | SRSF2    | PBRM1     | HNF1A    | EED     | INHA     |
| BTK     | GATA4    | PIM1     | STAG2    | PDGFRA    | HNF1B    | NRG1    | NKX3-1   |
| CARD11  | GATA6    | SH2B3    | STAT3    | PDGFRB    | HRAS     | BCL2L11 | PMAIP1   |
| CBFB    | GID4     | MAPK3    | STAT5B   | PIK3C2G   | KMT2C    | FANCI   | NCOA3    |
| CBL     | PDCD1LG2 | PAK7     | STK11    | PIK3CA    | IDH1     | EGFR    | PNRC1    |
| CHD2    | LATS1    | FAT3     | MGA      | PIK3CB    | IDH2     | EMSY    | SOX17    |
| CHD4    | KEAP1    | FANCE    | PRKCI    | PIK3CG    | IGF1R    | EP300   | ZBTB2    |
| CSF3R   | RAD51B   | FGFR2    | TOP2A    | PIK3R1    | IGF2     | EPHA3   | ZNF703   |
| CUL4B   | RARA     | MAP2K1   | NR4A3    | PIK3R2    | IKBKE    | EPHA5   | BCL10    |
| DNMT3B  | RAD51    | FGFR1    | PIK3C2B  | PLCG2     | IKZF1    | EPHA7   | DNAJB1   |
| FLCN    | PPM1D    | PPP6C    | SUFU     | PMS1      | IL7R     | EPHB1   | FGF10    |
| FLT1    | PRSS8    | GABRA6   | SYK      | PMS2      | INHBA    | ERBB2   | LYN      |
| FLT3    | RAB35    | ZNRF3    | TBX3     | POLD1     | INPP4B   | ERBB3   | PDK1     |
| FLT4    | RIT1     | ARID5B   | TERC     | POLE      | IRF4     | ERBB4   | RAD21    |
| FOXL2   | XIAP     | HSP90AA1 | TERT     | POM121L12 | IRS1     | ERCC1   | PDPK1    |
| FOXO1   | BCR      | CYLD     | TET2     | PPP2R1A   | IRS2     | ERG     | PLK2     |
| FOXP1   | EWSR1    | KEL      | TGFBR2   | PPP2R2A   | JAK1     | ERRFI1  | ERCC3    |
| FUBP1   | CCND1    | PARP4    | TNFAIP3  | PRDM1     | JAK2     | ESR1    | ERCC5    |
| FYN     | RBM10    | MAP2K4   | TMPRSS2  | PREX2     | KMT2A    | FANCG   | LZTR1    |
| GALNT12 | CCND2    | ZNF217   | TNFRSF14 | PRKAR1A   | JAK3     | EZH2    | TACC3    |
| GATA1   | CCND3    | FRS2     | TNFSF11  | PRKDC     | JUN      | FAM175A | MAP3K14  |
| GATA2   | CCNE1    | BIRC3    | TOP1     | PTCH1     | KDM5A    | FAM46C  | SUZ12    |
| GATA3   | CD274    | MAX      | TP53     | PTEN      | KDM5C    | FANCA   | CTNNA1   |
| GLI1    | CD79A    | TRAF2    | TP63     | PTPRS     | KMT2D    | FANCL   | DIS3     |
| GNA11   | CD79B    | KAT6A    | TSC1     | PTPRT     | KIT      | FANCF   | RFWD2    |
| GNAQ    | CDC73    | ARFRP1   | TSC2     | RASA1     | RAC1     | FGF3    | PIK3C3   |
| GNAS    | CDH1     | DCUN1D1  | TSHR     | RUNX1T1   | RAD51D   | FGFR4   | EPHA2    |
| GREM1   | CDK12    | IFNGR1   | U2AF1    | SNCAIP    | RB1      | MAP2K2  | PTK2     |

|        |        |        |       |        |        |       |       |
|--------|--------|--------|-------|--------|--------|-------|-------|
| GRIN2A | CDK4   | KLHL6  | VEGFA | STK40  | RNF43  | MDM2  |       |
| GRM3   | CDK6   | NEGR1  | VHL   | TAF1   | KRAS   | FAT1  | FANCM |
| GSK3B  | CDK8   | VEGFB  | WRN   | TCF3   | ROS1   | MDM4  |       |
| GSTM1  | CDKN1A | VEGFC  | WT1   | TCF7L2 | RAD51C | FGFR3 | ATF1  |
| TRRAP  | KDR    | FANCD2 | RPA1  |        |        |       |       |

**Table S3.** The univariate analysis on the correlation of selective methylation sites with DFS (n=39)

| Gene            | cg Number  | Methylated<br>(No. of pts) | Unmethylated<br>(No. of pts) | HR   | p-value |
|-----------------|------------|----------------------------|------------------------------|------|---------|
| <i>HOXA9</i>    | cg16104915 | 11                         | 28                           | 0.81 | 0.919   |
| <i>C1orf114</i> | cg08104202 | 2                          | 37                           | 1.09 | 0.972   |
| <i>TRH</i>      | cg22512438 | 9                          | 30                           | 4.34 | 0.375   |
| <i>SP9</i>      | cg08575330 | 0                          | 39                           | 1.35 | 0.961   |
| <i>OTX2</i>     | cg10042106 | 15                         | 24                           | 1.44 | 0.854   |
| <i>NPBWR1</i>   | cg26205771 | 5                          | 34                           | 8.8  | 0.178   |
| <i>ALX1</i>     | cg14996220 | 6                          | 33                           | 3.4  | 0.433   |

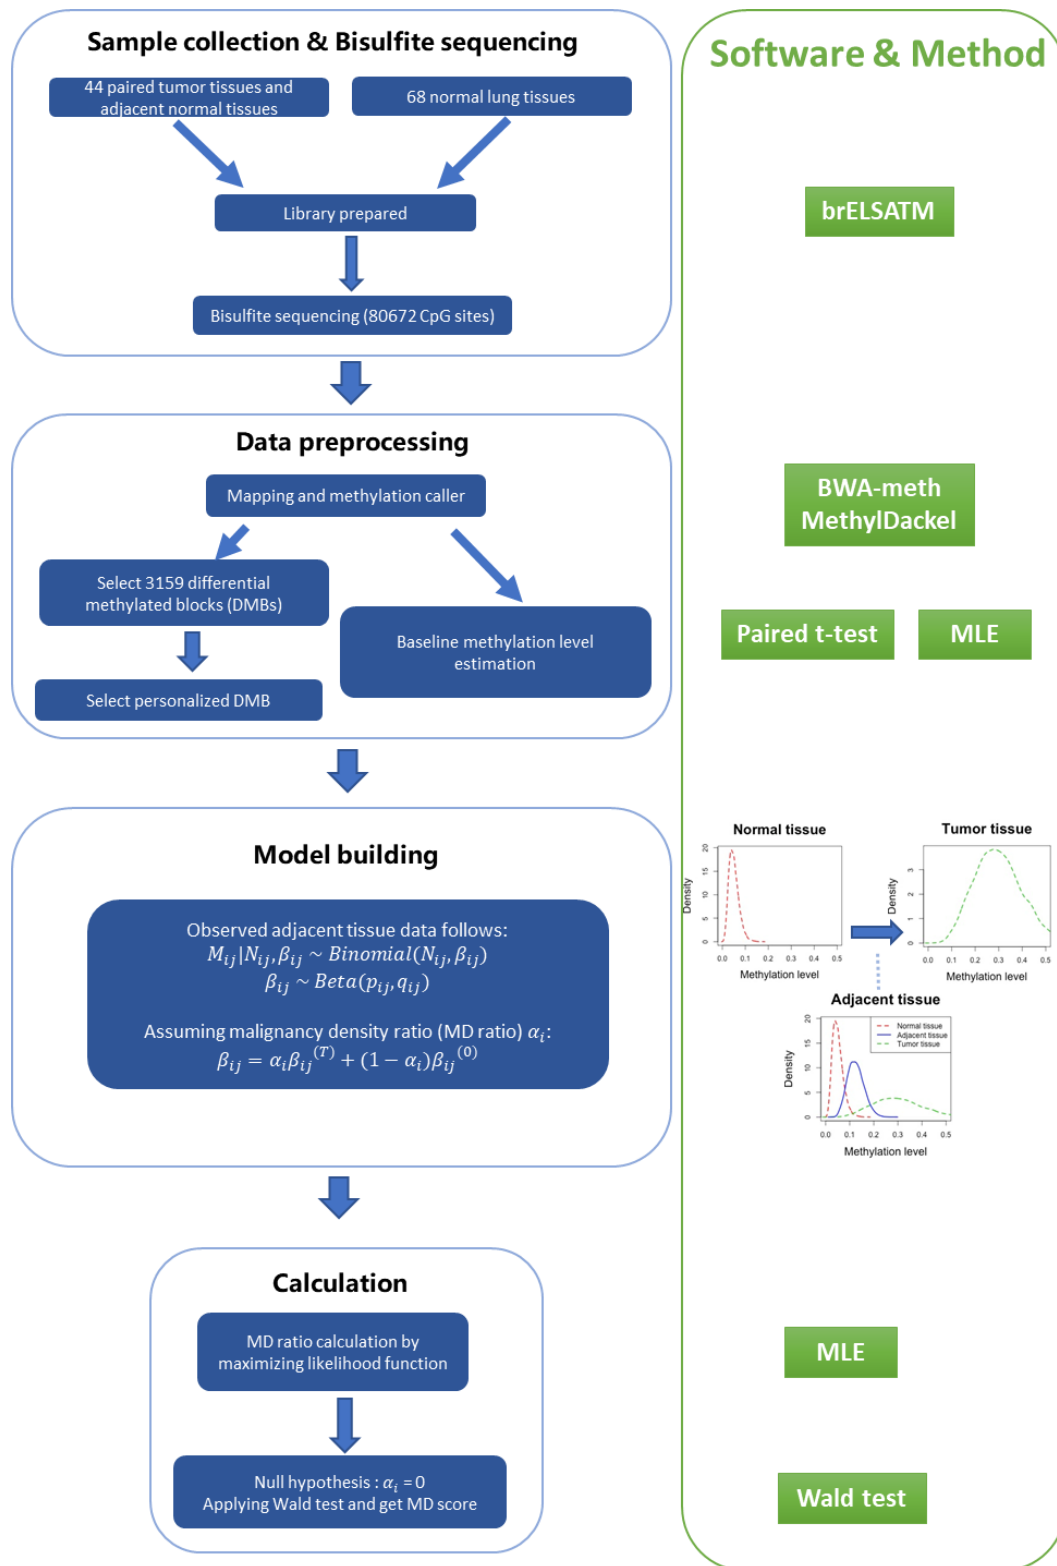

**Figure S1.** The flowchart of generating MD ratio and MD score.

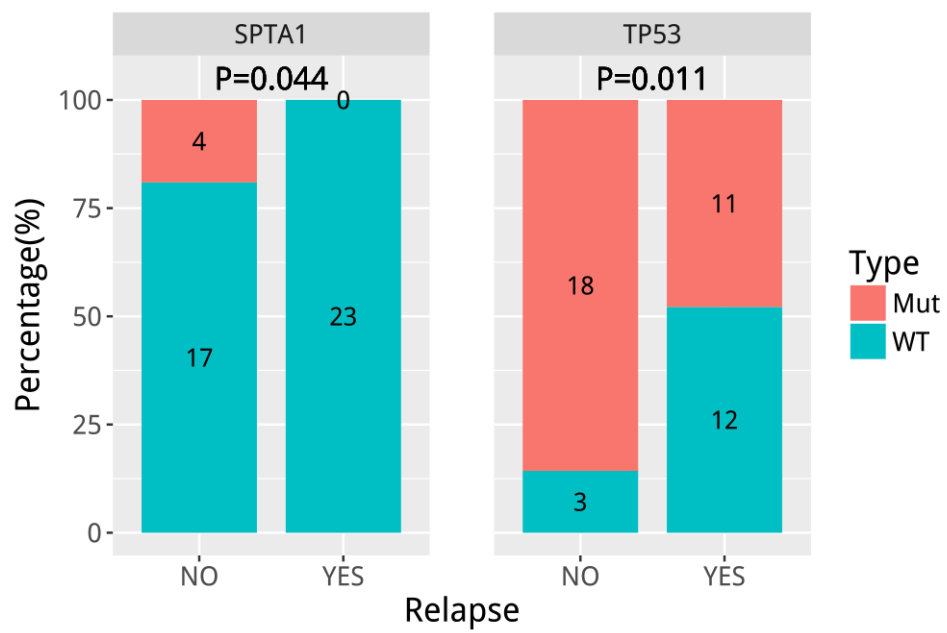

**Figure S2.** The correlation of genomic alteration with disease relapse.

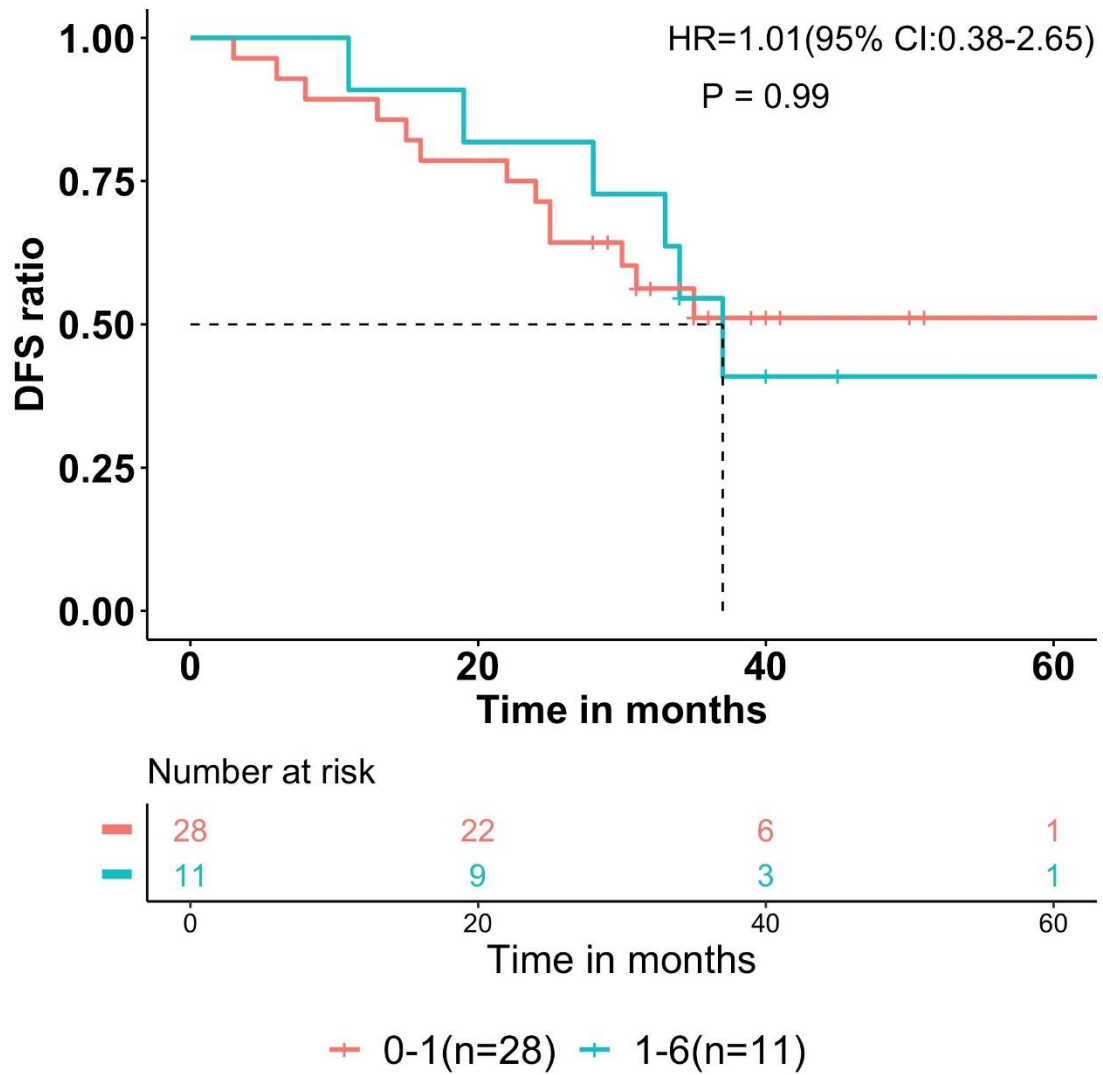

**Figure S3.** The disease-free survival (DFS) in patients stratified by methylation signature based on 7 selected markers (n=39). Patients were grouped by the number of methylated markers. Markers include *HOXA9*, *C1orf114*, *TRH*, *HIST1H4F*, *SP9*, *PCDHGB6*, *OTX2*, *NPBWR1*, *TRIM58*, and *ALX1*.
